# Supplementary material for: Tissue-resident memory T cells contribute to protection against heterologous SARS-CoV-2 challenge
Source: PubMed Central journal article supplement (PMC11623939; doi:10.1172/jci.insight.184074), 2024-12-06
Supplement: jciinsight-9-184074-s117.pdf [file jciinsight-9-184074-s117.pdf]

A

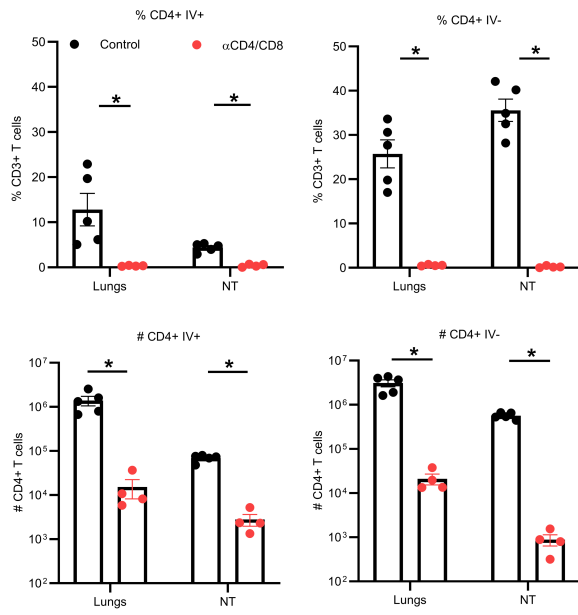

B

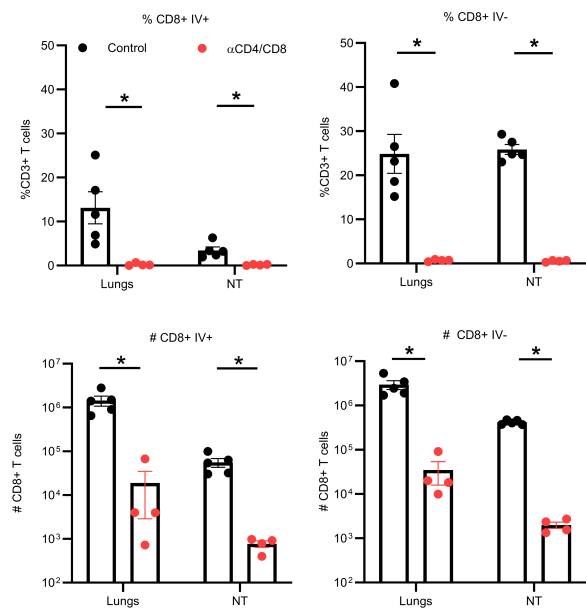

C

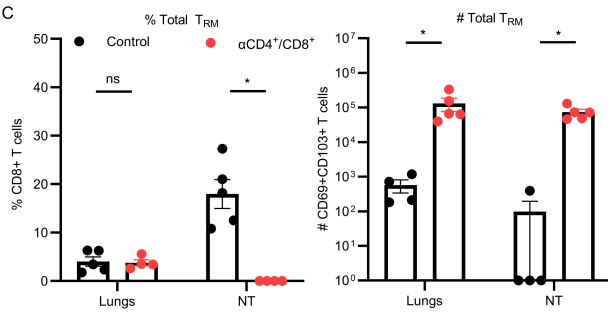

**A**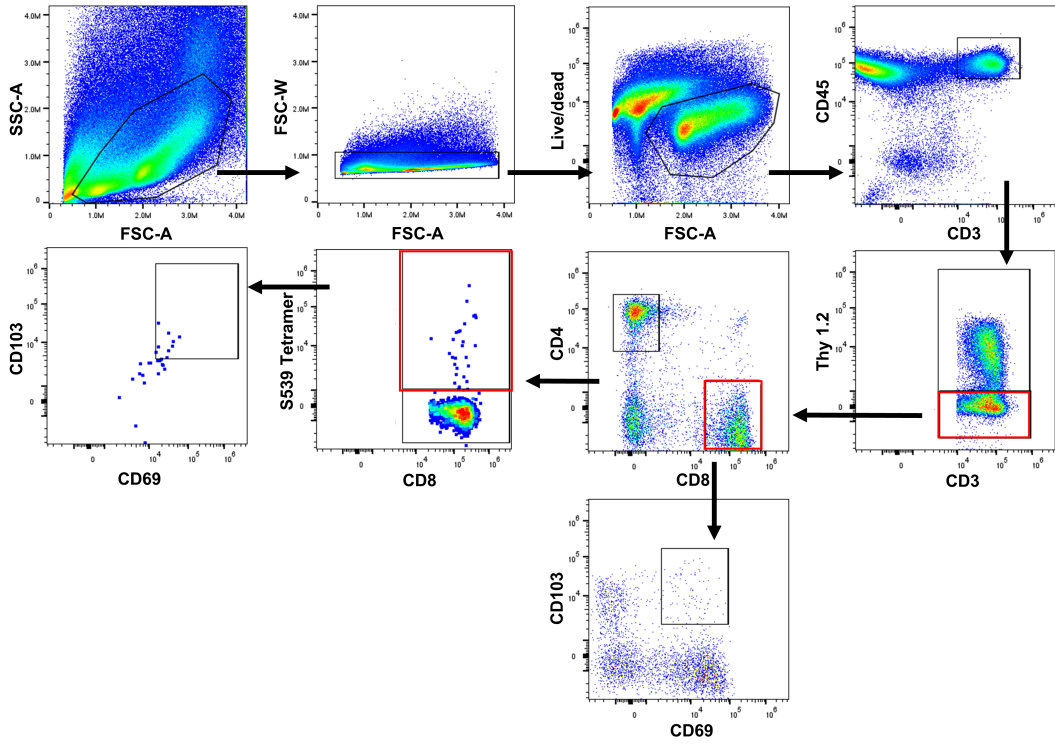**B**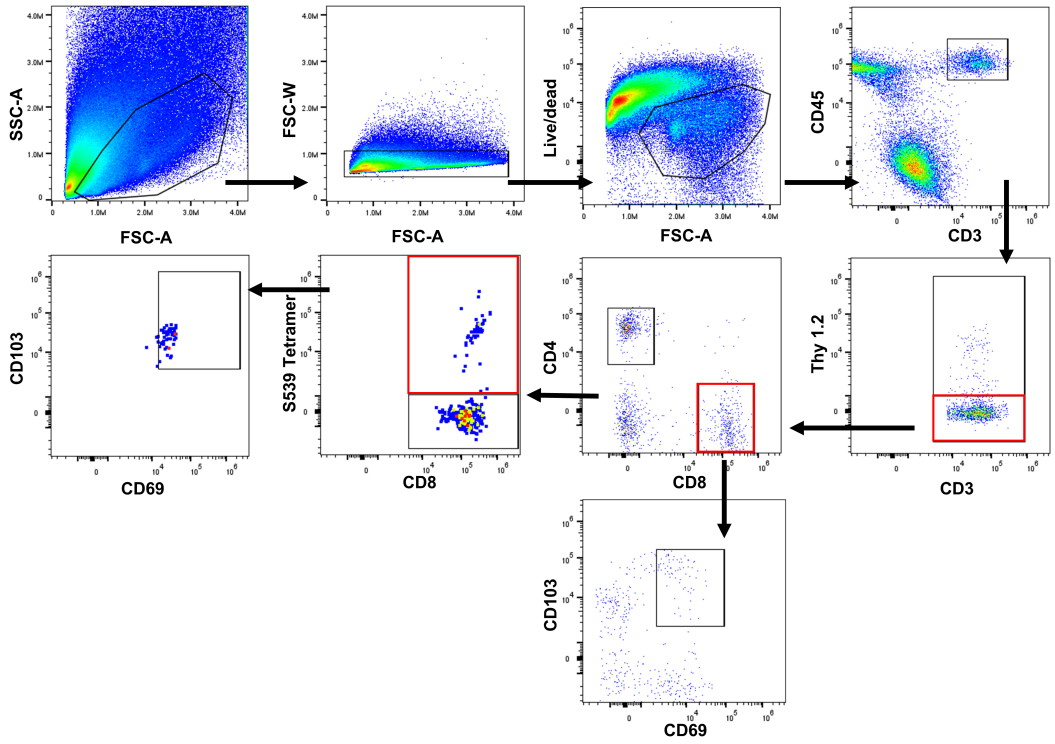**Supplementary Figure 2**
